# Supplementary material for: Burden of Lung Cancer Attributable to Occupational Carcinogens from 1990 to 2019 and Projections until 2044 in China
Source: MDPI journal article supplement (doi:10.3390/cancers14163883), 2022-08-11
Supplement: s1 [file s1]

**Table S1** Age-specific summary exposure value for occupational carcinogens in China,1990-2019

| Exposure                         | Year             |                  | Percent change     | Average annual percentage change |
|----------------------------------|------------------|------------------|--------------------|----------------------------------|
|                                  | 1990             | 1999             |                    |                                  |
| Silica                           | 4.85(2.57-10.64) | 4.61(2.46-10.04) | -4.93(-11.68-2.61) | -0.2(-0.2,-0.1)*                 |
| Diesel engine exhaust            | 2.21(2.15-2.28)  | 2.62(2.47-2.77)  | 18.32(11.00-25.86) | 0.6(0.5-0.6)*                    |
| Polycyclic aromatic hydrocarbons | 1.07(1.04-1.1)   | 1.25(1.17-1.35)  | 17.25(8.37-27.41)  | 0.5(0.5-0.6)*                    |
| Asbestos                         | 0.73(0.53-1.08)  | 0.78(0.61-0.96)  | 7.81(-31.88-58.85) | 0.2(0-0.4)                       |
| Nickel                           | 0.56(0.19-1.49)  | 0.56(0.18-1.45)  | 0.51(-6.49-8.98)   | 0(0-0.1)                         |
| Chromium                         | 0.53(0.51-0.55)  | 0.63(0.59-0.68)  | 18.69(9.4-29.55)   | 0.6(0.5-0.7)*                    |
| Arsenic                          | 0.51(0.21-0.87)  | 0.57(0.23-0.97)  | 10.55(2.04-20.98)  | 0.3(0.3-0.4)*                    |
| Cadmium                          | 0.27(0.26-0.28)  | 0.3(0.28-0.32)   | 10.71(2.83-19.76)  | 0.4(0.3-0.4)*                    |
| Beryllium                        | 0.14(0.14-0.14)  | 0.14(0.14-0.14)  | 0.52(-2.09-3.49)   | 0(0-0.1)                         |

\* Average annual percentage change was significantly different from 0 at the alpha=0.05 level

**Table S2** Trend of age-standardized PAF of occupational carcinogens for lung cancer death and DALYs in China,1990-2019

| Measure | Exposure                         | Year            |                 | Percent change       | Average annual percentage change |
|---------|----------------------------------|-----------------|-----------------|----------------------|----------------------------------|
|         |                                  | 1990            | 2019            |                      |                                  |
| Death   | Silica                           | 2.86(1.31-4.51) | 2.41(1.08-3.73) | -15.81(-22.46,-8.97) | -0.6(-0.7,-0.5)*                 |
|         | Asbestos                         | 2.46(1.56-3.79) | 3.4(2.19-4.85)  | 38.07(-3.83,84.4)    | 1.0(0.9,1.2)*                    |
|         | Diesel engine exhaust            | 1.05(0.92-1.2)  | 1.09(0.95-1.24) | 3.29(-4.96,12.12)    | 0.1(0,0.2)*                      |
|         | Nickel                           | 0.57(0.11-1.26) | 0.49(0.1-1.09)  | -13.66(-20.2,-6.62)  | -0.5(-0.6,-0.4)*                 |
|         | Arsenic                          | 0.51(0.19-0.83) | 0.48(0.18-0.79) | -5.94(-13.71,2.29)   | -0.2(-0.3,-0.1)*                 |
|         | Polycyclic aromatic hydrocarbons | 0.33(0.28-0.38) | 0.32(0.27-0.38) | -0.66(-8.95,8.63)    | 0(-0.1,0.1)                      |
|         | Chromium                         | 0.09(0.08-0.1)  | 0.09(0.08-0.11) | 0.24(-8.25,8.87)     | 0(-0.1,0.1)                      |
|         | Cadmium                          | 0.05(0.04-0.06) | 0.05(0.04-0.06) | -5.58(-13.61,3.25)   | -0.2(-0.3,-0.1)*                 |
|         | Beryllium                        | 0.02(0.02-0.03) | 0.02(0.02-0.02) | -11.32(-17.08,-5.4)  | -0.4(-0.5,-0.3)*                 |
| DALYs   | Silica                           | 3.55(1.62-5.58) | 3.11(1.39-4.8)  | -12.54(-18.94,-5.89) | -0.5(-0.5,-0.4)*                 |
|         | Asbestos                         | 1.75(1.08-2.73) | 2.51(1.59-3.66) | 43.3(-5.03,100.09)   | 1.2(1.0-1.4)*                    |
|         | DE                               | 1.31(1.15-1.48) | 1.4(1.24-1.6)   | 7.33(-0.5,15.7)      | 0.2(0.2-0.3)*                    |
|         | Nickel                           | 0.7(0.14-1.56)  | 0.63(0.12-1.41) | -10.1(-16.42,-3.11)  | -0.4(-0.4,-0.3)*                 |
|         | Arsenic                          | 0.63(0.24-1.03) | 0.62(0.23-1.02) | -1.9(-9.63,6.07)     | -0.1(-0.2,0)                     |
|         | PAH                              | 0.4(0.34-0.47)  | 0.42(0.35-0.49) | 3.63(-4.76,13.04)    | 0.1(0-0.2)*                      |
|         | Chromium                         | 0.12(0.1-0.13)  | 0.12(0.11-0.14) | 4.65(-3.74,13.17)    | 0.2(0.1,0.2)                     |
|         | Cadmium                          | 0.06(0.05-0.07) | 0.06(0.05-0.07) | -1.53(-9.51,7.12)    | -0.1(-0.1,0)                     |
|         | Beryllium                        | 0.03(0.02-0.03) | 0.03(0.02-0.03) | -7.96(-13.01,-2.53)  | -0.3(-0.4,-0.2)*                 |

\* Average annual percentage change was significantly different from 0 at the alpha=0.05 level

**Table S3** Trends of ASMR, ASDR of lung cancer attributable to occupational carcinogens in China,1990-2019

| Measure | Carcinogen                       | Year               |                    | Percent change      | Average annual percentage change | Netdrift                 |
|---------|----------------------------------|--------------------|--------------------|---------------------|----------------------------------|--------------------------|
|         |                                  | 1990               | 1999               |                     |                                  |                          |
| ASMR    | Silica                           | 0.89(0.41-1.43)    | 0.93(0.41-1.54)    | 4.59(-19.14-33.68)  | 0.2(0,0.3)                       | 0.50(-5.71,7.12)         |
|         | Asbestos                         | 0.77(0.49-1.19)    | 1.32(0.83-1.96)    | 71.64(17.1-145.68)  | 1.8(1.5,2.2)*                    | <b>2.39(0.99,3.81) *</b> |
|         | Diesel engine exhaust            | 0.33(0.26-0.4)     | 0.42(0.34-0.52)    | 28.15(-1.29-65.92)  | 0.9(0.7,1.1)*                    | 1.27(-5.88,8.98)         |
|         | Nickel                           | 0.18(0.04-0.39)    | 0.19(0.04-0.43)    | 7.24(-16.19-36.07)  | 0.2(0.0,0.4)*                    | 0.59(-5.73,7.35)         |
|         | Arsenic                          | 0.16(0.06-0.26)    | 0.19(0.07-0.31)    | 17.03(-8.63-48.76)  | 0.5(0.3,0.8)*                    | 0.90(-5.41,7.63)         |
|         | Polycyclic aromatic hydrocarbons | 0.1(0.08-0.12)     | 0.13(0.1-0.16)     | 23.29(-3.74-57.46)  | 0.7(0.5,1.0)*                    | 1.10(-5.42,8.07)         |
|         | Chromium                         | 0.03(0.02-0.04)    | 0.04(0.03-0.04)    | 24.43(-3.76-58.13)  | 0.8(0.5,1.0)*                    | 1.13(-8.62,11.92)        |
|         | Cadmium                          | 0.02(0.01-0.02)    | 0.02(0.01-0.02)    | 17.18(-9.01-49.77)  | 0.6(0.3,0.8)*                    | 0.91(-12.11,15.88)       |
|         | Beryllium                        | 0.01(0.01-0.01)    | 0.01(0.01-0.01)    | 10.07(-13.98-39.26) | 0.3(0.1,0.5)*                    | 0.69(-18.78,24.82)       |
| ASDR    | Silica                           | 27.02(12.56-43.21) | 25.85(11.47-42.46) | -4.34(-26.62-22.79) | -0.2(-0.4,0.1)                   | 0.49(-14.38,17.94)       |
|         | Asbestos                         | 13.31(8.21-20.74)  | 20.89(12.78-31.62) | 56.93(3.1-138.55)   | 1.5(1.2,1.7)*                    | 2.42(1.56,3.29) *        |
|         | DE                               | 9.97(8.02-12.15)   | 11.68(9.4-14.5)    | 17.23(-10.12-52.7)  | 0.6(0.3,0.8)*                    | 1.27(-15.70,21.65)       |
|         | Nickel                           | 5.34(1.1-11.75)    | 5.25(1.07-11.99)   | -1.71(-23.79-25.31) | -0.1(-0.3,0.1)                   | 0.59(-14.53,18.38)       |
|         | Arsenic                          | 4.79(1.7-7.88)     | 5.15(1.85-8.62)    | 7.48(-16.54-37.45)  | 0.3(0.1,0.5)*                    | 0.89(-14.15,18.57)       |
|         | PAHs                             | 3.08(2.48-3.77)    | 3.49(2.73-4.35)    | 13.2(-11.24-45.86)  | 0.4(0.2,0.6)*                    | 1.09(-14.39,19.37)       |
|         | Chromium                         | 0.89(0.73-1.07)    | 1.01(0.82-1.25)    | 14.35(-11.69-46.42) | 0.5(0.3-0.7)*                    | 1.12(-14.46,19.55)       |
|         | Cadmium                          | 0.47(0.37-0.58)    | 0.51(0.39-0.63)    | 7.58(-17.03-38.28)  | 0.3(0.1,0.5)*                    | 0.91(-14.33,18.85)       |
|         | Beryllium                        | 0.21(0.16-0.26)    | 0.21(0.17-0.27)    | 0.58(-21.86-27.79)  | 0(-0.2,0.2)                      | 0.68(-14.82,19.01)       |

\*Average annual percentage change or Netdrift was significantly different from 0 at the alpha=0.05 level

**Table S4** Age-specific annual percentage change(Local drift) of occupational carcinogen attributable lung cancer ASMR in China from 1990 to 2019

| Age  | Silica               | Asbestos          | Diesel engine exhaust | Nickel               | Arsenic              | Polycyclic aromatic hydrocarbons | Chromium             | Cadmium              | Beryllium           |
|------|----------------------|-------------------|-----------------------|----------------------|----------------------|----------------------------------|----------------------|----------------------|---------------------|
| 27.5 | -1.94(-3.71,-0.14) * | -3.55(-31.5,35.8) | -1.17(-2.96,0.65)     | -1.82(-3.63,0.03)    | -1.47(-3.27,0.36)    | -1.25(-3.05,0.59)                | -1.19(-3.91,1.60)    | -1.48(-5.28,2.47)    | -1.94(-7.67,4.15)   |
| 32.5 | -1.94(-2.95,-0.92) * | 0.9(-8.36,11.11)  | -1.19(-2.21,-0.15) *  | -1.80(-2.83,-0.75) * | -1.44(-2.47,-0.41) * | -1.24(-2.26,-0.20) *             | -1.19(-2.74,0.39)    | -1.45(-3.62,0.77)    | -1.86(-5.16,1.56)   |
| 37.5 | -2.36(-3.02,-1.69) * | 1.89(-2.03,5.96)  | -1.65(-2.32,-0.97) *  | -2.23(-2.91,-1.55) * | -1.89(-2.56,-1.22) * | -1.71(-2.38,-1.03) *             | -1.66(-2.68,-0.63) * | -1.90(-3.32,-0.45) * | -2.23(-4.39,-0.02)  |
| 42.5 | -2.14(-2.53,-1.74) * | 2.07(0.53,3.62) * | -1.42(-1.82,-1.02) *  | -2.02(-2.43,-1.62) * | -1.70(-2.10,-1.30) * | -1.52(-1.92,-1.11) *             | -1.48(-2.09,-0.86) * | -1.70(-2.55,-0.84) * | -1.97(-3.25,-0.66)  |
| 47.5 | -1.33(-1.59,-1.06) * | 2.91(2.14,3.68) * | -0.59(-0.87,-0.31) *  | -1.22(-1.49,-0.94) * | -0.90(-1.17,-0.62) * | -0.71(-0.99,-0.43) *             | -0.67(-1.09,-0.25) * | -0.89(-1.48,-0.30) * | -1.15(-2.03,-0.26)  |
| 52.5 | -0.83(-1.05,-0.62) * | 3.12(2.64,3.61) * | -0.1(-0.32,0.12)      | -0.72(-0.94,-0.50) * | -0.39(-0.61,-0.17) * | -0.2(-0.42,0.02)                 | -0.16(-0.50,0.18)    | -0.39(-0.86,0.08)    | -0.69(-1.39,0.02)   |
| 57.5 | -0.75(-0.94,-0.56) * | 2.45(2.08,2.81) * | -0.01(-0.21,0.19)     | -0.67(-0.86,-0.47) * | -0.34(-0.54,-0.14) * | -0.15(-0.35,0.06)                | -0.11(-0.41,0.20)    | -0.34(-0.76,0.08)    | -0.62(-1.26,0.02)   |
| 62.5 | 0.04(-0.13,0.22)     | 2.06(1.76,2.36) * | 0.80(0.62,0.98) *     | 0.12(-0.05,0.30)     | 0.42(0.24,0.60) *    | 0.61(0.43,0.80) *                | 0.65(0.37,0.92) *    | 0.44(0.05,0.82) *    | 0.25(-0.33,0.83)    |
| 67.5 | 0.49(0.29,0.68) *    | 1.82(1.56,2.08) * | 1.26(1.05,1.46) *     | 0.55(0.34,0.75) *    | 0.82(0.62,1.03) *    | 1.02(0.81,1.23) *                | 1.04(0.73,1.36) *    | 0.85(0.41,1.29) *    | 0.7(0.04,1.37)      |
| 72.5 | 1.18(0.90,1.45) *    | 2.17(1.93,2.4) *  | 1.97(1.67,2.26) *     | 1.23(0.94,1.51) *    | 1.49(1.21,1.78) *    | 1.69(1.40,1.99) *                | 1.72(1.27,2.16) *    | 1.52(0.91,2.14) *    | 1.39(0.47,2.33)     |
| 77.5 | 2.33(1.84,2.82) *    | 3.13(2.90,3.36) * | 3.16(2.63,3.69) *     | 2.39(1.88,2.90) *    | 2.65(2.13,3.16) *    | 2.85(2.33,3.38) *                | 2.87(2.08,3.68) *    | 2.67(1.58,3.78) *    | 2.55(0.9,4.23)      |
| 82.5 | 3.50(2.30,4.72) *    | 3.84(3.54,4.13) * | 4.34(3.02,5.68) *     | 3.58(2.33,4.85) *    | 3.86(2.59,5.14) *    | 4.07(2.76,5.39) *                | 4.09(2.12,6.10) *    | 3.88(1.19,6.65) *    | 3.72(-0.35,7.96)    |
| 87.5 | 4.11(0.25,8.12) *    | 4.17(3.71,4.64) * | 4.96(0.66,9.44) *     | 4.22(0.21,8.39) *    | 4.5(0.45,8.71) *     | 4.70(0.54,9.03) *                | 4.72(-1.52,11.36)    | 4.52(-3.94,13.72)    | 4.36(-8.27,18.74)   |
| 92.5 | 4.71(-16.41,31.16)   | 3.68(2.60,4.77) * | 5.54(-18.15,36.09)    | 4.90(-16.78,32.23)   | 5.2(-16.57,32.65)    | 5.39(-16.99,33.81)               | 5.41(-26.65,51.49)   | 5.23(-35.91,72.79)   | 5.08(-51.01,125.43) |

\* Age-specific annual percentage change(Local drift) was significantly different from 0 at the alpha=0.05 level

**Table S5** Age-specific annual percentage change(Local drift) of occupational carcinogen attributable lung cancer ASDR in China from 1990 to 2019

| Age  | Silica               | Asbestos            | Diesel engine exhaust | Nickel               | Arsenic              | Polycyclic aromatic hydrocarbons | Chromium             | Cadmium              | Beryllium            |
|------|----------------------|---------------------|-----------------------|----------------------|----------------------|----------------------------------|----------------------|----------------------|----------------------|
| 27.5 | -1.93(-3.27,-0.58) * | -3.55(-20.99,17.74) | -1.16(-2.51,0.21)     | -1.80(-3.18,-0.41)   | -1.45(-2.81,-0.08) * | -1.23(-2.59,0.15)                | -1.18(-2.53,0.20)    | -1.47(-2.84,-0.08) * | -1.93(-3.30,-0.53) * |
| 32.5 | -1.93(-2.72,-1.13) * | 0.89(-4.84,6.97)    | -1.17(-1.97,-0.36) *  | -1.78(-2.59,-0.96) * | -1.42(-2.22,-0.62) * | -1.22(-2.02,-0.41) *             | -1.17(-1.97,-0.36) * | -1.43(-2.24,-0.62) * | -1.84(-2.65,-1.02) * |
| 37.5 | -2.34(-2.88,-1.80) * | 1.92(-0.59,4.49)    | -1.63(-2.17,-1.08) *  | -2.21(-2.76,-1.66) * | -1.87(-2.42,-1.32) * | -1.68(-2.23,-1.13) *             | -1.64(-2.18,-1.09) * | -1.88(-2.43,-1.32) * | -2.21(-2.76,-1.66) * |
| 42.5 | -2.11(-2.45,-1.77) * | 2.1(1.07,3.15) *    | -1.4(-1.74,-1.05) *   | -2.00(-2.34,-1.65) * | -1.67(-2.02,-1.32) * | -1.49(-1.83,-1.14) *             | -1.45(-1.79,-1.10) * | -1.67(-2.02,-1.32) * | -1.94(-2.29,-1.60) * |
| 47.5 | -1.30(-1.55,-1.05) * | 2.95(2.39,3.51) *   | -0.56(-0.81,-0.31) *  | -1.19(-1.44,-0.94) * | -0.87(-1.12,-0.61) * | -0.68(-0.93,-0.42) *             | -0.64(-0.89,-0.38) * | -0.86(-1.12,-0.61) * | -1.12(-1.37,-0.87) * |
| 52.5 | -0.80(-1.00,-0.59) * | 3.2(2.82,3.58) *    | -0.06(-0.27,0.16)     | -0.68(-0.90,-0.47) * | -0.35(-0.57,-0.14) * | -0.16(-0.37,0.06) *              | -0.12(-0.33,0.10)    | -0.35(-0.56,-0.13) * | -0.65(-0.86,-0.43) * |
| 57.5 | -0.73(-0.93,-0.53) * | 2.53(2.22,2.84) *   | 0.01(-0.19,0.22)      | -0.65(-0.85,-0.44) * | -0.32(-0.53,-0.12) * | -0.13(-0.33,0.08)                | -0.09(-0.29,0.12)    | -0.32(-0.53,-0.11) * | -0.60(-0.80,-0.40) * |
| 62.5 | 0.05(-0.14,0.25)     | 2.13(1.86,2.40) *   | 0.81(0.60,1.01) *     | 0.13(-0.07,0.34)     | 0.43(0.23,0.64) *    | 0.62(0.42,0.83) *                | 0.66(0.45,0.86) *    | 0.45(0.24,0.65) *    | 0.25(0.05,0.46) *    |
| 67.5 | 0.48(0.23,0.72) *    | 1.86(1.61,2.11) *   | 1.24(0.98,1.50) *     | 0.53(0.28,0.79) *    | 0.81(0.56,1.07) *    | 1.00(0.74,1.27) *                | 1.03(0.77,1.29) *    | 0.83(0.57,1.09) *    | 0.69(0.43,0.95) *    |
| 72.5 | 1.13(0.76,1.51) *    | 2.15(1.90,2.40)     | 1.92(1.52,2.33) *     | 1.18(0.79,1.57) *    | 1.45(1.05,1.84) *    | 1.65(1.25,2.05) *                | 1.67(1.27,2.07) *    | 1.48(1.08,1.88) *    | 1.35(0.95,1.75) *    |
| 77.5 | 2.29(1.54,3.03) *    | 3.07(2.79,3.35) *   | 3.11(2.31,3.93) *     | 2.34(1.56,3.11) *    | 2.60(1.81,3.38) *    | 2.80(2.01,3.60) *                | 2.82(2.02,3.63) *    | 2.62(1.84,3.42) *    | 2.50(1.72,3.29) *    |
| 82.5 | 3.45(1.38,5.57) *    | 3.82(3.41,4.23) *   | 4.29(2.02,6.61) *     | 3.53(1.37,5.73) *    | 3.80(1.63,6.03) *    | 4.01(1.78,6.29) *                | 4.04(1.8,6.32) *     | 3.83(1.63,6.08) *    | 3.67(1.47,5.92) *    |
| 87.5 | 4.06(-3.37,12.06)    | 4.21(3.49,4.94) *   | 4.91(-3.32,13.84)     | 4.16(-3.54,12.47)    | 4.44(-3.31,12.81)    | 4.64(-3.31,13.24)                | 4.67(-3.31,13.3)     | 4.46(-3.38,12.94)    | 4.31(-3.56,12.82)    |
| 92.5 | 4.64(-36.54,72.55)   | 3.75(1.88,5.65) *   | 5.47(-39.89,85.07)    | 4.83(-37.28,75.23)   | 5.13(-37.05,75.59)   | 5.32(-37.81,78.37)               | 5.34(-38,78.97)      | 5.16(-37.45,76.82)   | 5.02(-37.92,77.64)   |

\* Age-specific annual percentage change(Local drift) was significantly different from 0 at the alpha=0.05 level

**Table S6** Period effect of occupational carcinogen attributable lung cancer ASDR and ASMR in China from 1990 to 2019

| Measure | Year   | Silica           | Asbestos         | Diesel engine exhaust | Nickel           | Arsenic          | Polycyclic aromatic hydrocarbons | Chromium         | Cadmium         | Beryllium        |
|---------|--------|------------------|------------------|-----------------------|------------------|------------------|----------------------------------|------------------|-----------------|------------------|
| ASMR    | 1992.5 | 0.9(0.48,1.71)   | 0.89(0.76,1.03)  | 0.85(0.41,1.78)       | 0.89(0.47,1.71)  | 0.87(0.46,1.67)  | 0.86(0.44,1.68)                  | 0.86(0.31,2.36)  | 0.87(0.22,3.48) | 0.89(0.10,7.68)  |
|         | 1997.5 | 0.92(0.67,1.26)  | 0.83(0.76,0.91)* | 0.89(0.61,1.28)       | 0.91(0.66,1.27)  | 0.9(0.65,1.25)   | 0.9(0.64,1.25)                   | 0.89(0.54,1.49)  | 0.9(0.45,1.81)  | 0.91(0.31,2.7)   |
|         | 2002.5 | 1                | 1                | 1                     | 1                | 1                | 1                                | 1                | 1               | 1                |
|         | 2007.5 | 1(0.73,1.39)     | 1.29(1.19,1.40)* | 1.05(0.73,1.52)       | 1.01(0.73,1.40)  | 1.03(0.74,1.42)  | 1.04(0.74,1.45)                  | 1.04(0.63,1.73)  | 1.03(0.51,2.06) | 1.02(0.34,2.99)  |
|         | 2012.5 | 1(0.53,1.89)     | 1.55(1.34,1.78)* | 1.1(0.53,2.28)        | 1.01(0.53,1.93)  | 1.05(0.55,2.00)  | 1.07(0.55,2.09)                  | 1.07(0.39,2.96)  | 1.05(0.26,4.19) | 1.02(0.12,8.81)  |
|         | 2017.5 | 1.02(0.39,2.66)  | 1.33(1.08,1.63)* | 1.16(0.39,3.48)       | 1.04(0.39,2.75)  | 1.09(0.41,2.87)  | 1.12(0.41,3.06)                  | 1.13(0.25,5.16)  | 1.09(0.14,8.68) | 1.06(0.04,26.61) |
| ASDR    | 1992.5 | 0.89(0.18,4.43)  | 0.88(0.8,0.97)*  | 0.84(0.13,5.28)       | 0.88(0.17,4.51)  | 0.86(0.17,4.33)  | 0.85(0.16,4.48)                  | 0.85(0.16,4.52)  | 0.86(0.17,4.43) | 0.88(0.17,4.7)   |
|         | 1997.5 | 0.92(0.41,2.05)  | 0.82(0.76,0.88)* | 0.89(0.35,2.22)       | 0.92(0.41,2.07)  | 0.91(0.40,2.03)  | 0.9(0.39,2.06)                   | 0.9(0.39,2.07)   | 0.9(0.40,2.05)  | 0.92(0.40,2.12)  |
|         | 2002.5 | 1                | 1                | 1                     | 1                | 1                | 1                                | 1                | 1               | 1                |
|         | 2007.5 | 1(0.45,2.23)     | 1.29(1.22,1.38)* | 1.05(0.42,2.63)       | 1.01(0.44,2.27)  | 1.02(0.46,2.30)  | 1.03(0.45,2.38)                  | 1.04(0.45,2.40)  | 1.02(0.45,2.32) | 1.01(0.44,2.33)  |
|         | 2012.5 | 0.99(0.2,4.91)   | 1.55(1.41,1.70)* | 1.09(0.17,6.79)       | 1(0.20,5.10)     | 1.04(0.21,5.21)  | 1.06(0.20,5.59)                  | 1.06(0.20,5.68)  | 1.04(0.20,5.34) | 1.01(0.19,5.4)   |
|         | 2017.5 | 1.01(0.09,11.19) | 1.32(1.16,1.50)* | 1.15(0.07,18)         | 1.03(0.09,11.83) | 1.08(0.10,12.17) | 1.12(0.09,13.50)                 | 1.12(0.09,13.79) | 1.08(0.09,12.6) | 1.05(0.09,12.92) |

\*Period RR was significantly different from 1 at the alpha=0.05 level.

**Table S7** Birth cohort effect of occupational carcinogen attributable lung cancer ASMR in China from 1990 to 2019

| Birth year | Silica            | Asbestos          | DE                | Nickel            | Arsenic           | PAHs              | Chromium          | Cadmium           | Beryllium         |
|------------|-------------------|-------------------|-------------------|-------------------|-------------------|-------------------|-------------------|-------------------|-------------------|
| 1905       | 0.38(0.1,1.38)    | 0.33(0.28,0.38) * | 0.28(0.07,1.2)    | 0.37(0.10,1.41)   | 0.34(0.09,1.3) *  | 0.31(0.08,1.26)   | 0.31(0.04,2.57)   | 0.33(0.02,6.02)   | 0.35(0.28,82)     |
| 1910       | 0.47(0.31,0.69) * | 0.4(0.36,0.44) *  | 0.37(0.24,0.56) * | 0.46(0.30,0.69) * | 0.42(0.28,0.64) * | 0.4(0.26,0.61) *  | 0.4(0.21,0.76) *  | 0.42(0.17,1.02)   | 0.43(0.11,1.68)   |
| 1915       | 0.57(0.49,0.67) * | 0.47(0.44,0.50) * | 0.47(0.40,0.56) * | 0.57(0.48,0.67) * | 0.53(0.45,0.63) * | 0.51(0.43,0.60) * | 0.5(0.39,0.65) *  | 0.53(0.37,0.75) * | 0.54(0.32,0.93) * |
| 1920       | 0.73(0.67,0.80) * | 0.6(0.57,0.63) *  | 0.62(0.57,0.68) * | 0.73(0.67,0.79) * | 0.69(0.63,0.76) * | 0.66(0.61,0.73) * | 0.66(0.58,0.76) * | 0.69(0.57,0.83) * | 0.7(0.52,0.93) *  |
| 1925       | 0.89(0.84,0.94) * | 0.76(0.73,0.80) * | 0.79(0.74,0.84) * | 0.89(0.83,0.94) * | 0.86(0.80,0.91) * | 0.83(0.78,0.88) * | 0.83(0.75,0.91) * | 0.85(0.75,0.97) * | 0.86(0.7,1.04)    |
| 1930       | 1(0.96,1.05)      | 0.89(0.85,0.93) * | 0.92(0.88,0.97) * | 1(0.95,1.05)      | 0.98(0.93,1.03)   | 0.96(0.91,1.01)   | 0.96(0.89,1.03)   | 0.97(0.88,1.08)   | 0.97(0.83,1.14)   |
| 1935       | 1.07(1.03,1.12)   | 0.97(0.93,1.02)   | 1.03(0.99,1.07)   | 1.07(1.03,1.12) * | 1.06(1.02,1.11) * | 1.05(1.01,1.10) * | 1.05(0.99,1.13)   | 1.06(0.97,1.16)   | 1.05(0.92,1.21)   |
| 1940       | 1                 | 1                 | 1                 | 1                 | 1                 | 1                 | 1                 | 1                 | 1                 |
| 1945       | 1.01(0.97,1.06)   | 1.06(1.00,1.12) * | 1.05(1.00,1.09) * | 1.02(0.98,1.06)   | 1.04(1.00,1.08) * | 1.05(1.01,1.09) * | 1.05(0.99,1.12)   | 1.04(0.95,1.14)   | 1.02(0.89,1.16)   |
| 1950       | 1.06(1.02,1.1) *  | 1.28(1.2,1.37) *  | 1.14(1.09,1.19) * | 1.07(1.03,1.12) * | 1.11(1.07,1.16) * | 1.13(1.09,1.18) * | 1.14(1.07,1.21) * | 1.11(1.02,1.21) * | 1.08(0.94,1.23)   |
| 1955       | 1.02(0.98,1.07)   | 1.52(1.41,1.64) * | 1.14(1.09,1.19) * | 1.04(0.99,1.09)   | 1.09(1.05,1.14) * | 1.13(1.08,1.18) * | 1.13(1.06,1.21) * | 1.09(1.00,1.2) *  | 1.04(0.9,1.21)    |
| 1960       | 0.81(0.76,0.85) * | 1.7(1.54,1.87) *  | 0.93(0.88,0.99) * | 0.82(0.78,0.87) * | 0.88(0.83,0.93) * | 0.92(0.87,0.97) * | 0.93(0.85,1.01)   | 0.88(0.78,0.99) * | 0.82(0.68,0.98) * |
| 1965       | 0.86(0.81,0.92) * | 2.14(1.87,2.45) * | 1.03(0.97,1.10)   | 0.89(0.84,0.95) * | 0.97(0.91,1.03)   | 1.01(0.95,1.08)   | 1.02(0.93,1.12)   | 0.97(0.85,1.11)   | 0.9(0.74,1.1)     |
| 1970       | 0.75(0.69,0.82) * | 2.08(1.65,2.62) * | 0.94(0.86,1.02)   | 0.78(0.72,0.85) * | 0.86(0.79,0.94) * | 0.91(0.84,0.99) * | 0.92(0.81,1.05)   | 0.86(0.72,1.03)   | 0.79(0.6,1.04)    |
| 1975       | 0.59(0.52,0.67) * | 2.07(1.27,3.39) * | 0.76(0.67,0.86) * | 0.61(0.54,0.70) * | 0.69(0.61,0.79) * | 0.74(0.65,0.84) * | 0.75(0.62,0.91) * | 0.69(0.53,0.91) * | 0.62(0.41,0.94) * |
| 1980       | 0.55(0.44,0.68) * | 2.61(0.7,9.67)    | 0.73(0.59,0.92) * | 0.58(0.46,0.72) * | 0.66(0.53,0.83) * | 0.72(0.58,0.9) *  | 0.73(0.52,1.02)   | 0.66(0.41,1.06)   | 0.57(0.28,1.18)   |
| 1985       | 0.56(0.4,0.77) *  | 2.07(0.08,51.26)  | 0.79(0.57,1.09)   | 0.59(0.42,0.83) * | 0.69(0.5,0.96) *  | 0.76(0.55,1.06)   | 0.78(0.47,1.28)   | 0.69(0.34,1.39)   | 0.58(0.2,1.72)    |
| 1990       | 0.53(0.29,0.95) * | 0.58(0.74335.27)  | 0.77(0.42,1.38)   | 0.56(0.31,1.02)   | 0.66(0.36,1.2)    | 0.73(0.40,1.33)   | 0.75(0.31,1.84)   | 0.66(0.19,2.35)   | 0.56(0.08,3.89)   |

\*Birth cohort RR was significantly different from 1 at the alpha=0.05 level.

**Table S8** Birth cohort effect of occupational carcinogen attributable lung cancer ASDR in China from 1990 to 2019 Cohort-dalys

| Birth cohort | Silica           | Asbestos         | DE               | Nickel           | Arsenic          | PAHs             | Chromium         | Cadmium          | Beryllium        |
|--------------|------------------|------------------|------------------|------------------|------------------|------------------|------------------|------------------|------------------|
| 1905         | 0.38(0.03,4.92)* | 0.33(0.26,0.41)* | 0.29(0.02,4.83)  | 0.37(0.03,5.26)  | 0.34(0.02,4.87)  | 0.32(0.02,4.86)  | 0.32(0.02,4.87)  | 0.34(0.02,4.98)  | 0.35(0.02,5.23)  |
| 1910         | 0.47(0.24,0.94)* | 0.4(0.35,0.46)*  | 0.37(0.18,0.78)* | 0.46(0.23,0.95)* | 0.43(0.21,0.89)* | 0.41(0.19,0.85)* | 0.4(0.19,0.85)*  | 0.43(0.21,0.89)* | 0.44(0.21,0.91)* |
| 1915         | 0.58(0.46,0.74)* | 0.47(0.44,0.52)* | 0.47(0.37,0.61)* | 0.57(0.45,0.74)* | 0.54(0.42,0.69)* | 0.51(0.4,0.66)*  | 0.51(0.39,0.66)* | 0.54(0.41,0.69)* | 0.55(0.43,0.71)* |
| 1920         | 0.74(0.66,0.83)* | 0.61(0.57,0.65)* | 0.63(0.56,0.72)* | 0.74(0.65,0.83)* | 0.7(0.62,0.79)*  | 0.67(0.59,0.76)* | 0.67(0.59,0.76)* | 0.70(0.61,0.79)* | 0.71(0.62,0.80)* |
| 1925         | 0.89(0.83,0.96)* | 0.77(0.73,0.81)* | 0.79(0.73,0.86)* | 0.89(0.82,0.96)* | 0.86(0.8,0.93)*  | 0.84(0.77,0.91)* | 0.84(0.77,0.90)* | 0.86(0.79,0.93)* | 0.86(0.80,0.93)* |
| 1930         | 1(0.95,1.06)     | 0.89(0.85,0.94)* | 0.93(0.87,0.98)* | 1(0.94,1.06)     | 0.98(0.92,1.04)  | 0.96(0.9,1.02)   | 0.96(0.90,1.02)  | 0.98(0.92,1.04)  | 0.98(0.92,1.03)  |
| 1935         | 1.07(1.02,1.13)* | 0.97(0.93,1.02)  | 1.03(0.98,1.09)  | 1.08(1.02,1.13)  | 1.07(1.01,1.12)* | 1.06(1.00,1.11)* | 1.06(1.00,1.11)* | 1.06(1.01,1.12)* | 1.06(1.00,1.11)* |
| 1940         | 1                | 1                | 1                | 1                | 1                | 1                | 1                | 1                | 1                |
| 1945         | 1.01(0.97,1.06)  | 1.08(1.02,1.13)* | 1.05(1.00,1.10)* | 1.02(0.97,1.07)  | 1.04(0.99,1.09)  | 1.05(1.00,1.10)* | 1.05(1.00,1.10)* | 1.04(0.99,1.09)  | 1.02(0.97,1.07)  |
| 1950         | 1.06(1.02,1.11)* | 1.31(1.23,1.38)* | 1.14(1.09,1.2)*  | 1.08(1.03,1.13)  | 1.12(1.07,1.17)* | 1.14(1.09,1.19)* | 1.14(1.09,1.20)* | 1.12(1.07,1.17)* | 1.08(1.03,1.13)* |
| 1955         | 1.02(0.98,1.07)  | 1.54(1.44,1.65)* | 1.14(1.09,1.2)*  | 1.04(1.00,1.1)   | 1.1(1.05,1.15)*  | 1.13(1.08,1.19)* | 1.14(1.09,1.20)* | 1.1(1.05,1.15)*  | 1.05(1.00,1.10)* |
| 1960         | 0.81(0.77,0.86)* | 1.73(1.60,1.87)* | 0.94(0.89,0.99)* | 0.83(0.78,0.88)* | 0.89(0.84,0.94)* | 0.92(0.87,0.98)* | 0.93(0.88,0.99)* | 0.89(0.84,0.94)* | 0.82(0.78,0.87)* |
| 1965         | 0.87(0.82,0.92)* | 2.19(1.97,2.43)* | 1.05(0.98,1.11)  | 0.9(0.85,0.96)*  | 0.98(0.92,1.04)  | 1.02(0.96,1.09)  | 1.03(0.97,1.1)   | 0.98(0.92,1.04)  | 0.91(0.86,0.97)* |
| 1970         | 0.76(0.70,0.82)* | 2.13(1.81,2.51)* | 0.94(0.87,1.02)  | 0.79(0.73,0.85)* | 0.87(0.8,0.94)*  | 0.92(0.85,0.99)* | 0.93(0.86,1.01)  | 0.87(0.8,0.94)*  | 0.8(0.74,0.86)*  |
| 1975         | 0.6(0.53,0.66)*  | 2.13(1.53,2.96)* | 0.77(0.69,0.86)* | 0.62(0.56,0.70)* | 0.7(0.63,0.78)*  | 0.75(0.67,0.84)* | 0.76(0.68,0.85)* | 0.7(0.63,0.78)*  | 0.63(0.56,0.70)* |
| 1980         | 0.55(0.46,0.66)* | 2.66(1.16,6.11)* | 0.74(0.62,0.89)* | 0.58(0.49,0.70)* | 0.67(0.56,0.80)* | 0.72(0.61,0.87)* | 0.74(0.62,0.88)* | 0.67(0.56,0.80)* | 0.58(0.48,0.69)* |
| 1985         | 0.57(0.44,0.73)* | 2.1(0.30,14.67)  | 0.8(0.62,1.03)   | 0.6(0.46,0.78)*  | 0.7(0.54,0.91)*  | 0.77(0.60,1.00)  | 0.79(0.61,1.02)  | 0.70(0.54,0.91)* | 0.59(0.46,0.77)* |
| 1990         | 0.53(0.34,0.83)* | 0.6(0.56,0.5)    | 0.77(0.5,1.21)   | 0.57(0.36,0.89)* | 0.67(0.43,1.05)  | 0.74(0.47,1.16)  | 0.76(0.49,1.18)  | 0.67(0.43,1.05)  | 0.56(0.36,0.88)* |

\*Birth cohort RR was significantly different from 1 at the alpha=0.05 level.



**Table S9** Predicted age-specific rate of lung cancer death attributable to occupational carcinogens

| Year | Age group             |                       |                       |                       |       |       |       |       |       |       |       |       |       |       |       |       |       |       |
|------|-----------------------|-----------------------|-----------------------|-----------------------|-------|-------|-------|-------|-------|-------|-------|-------|-------|-------|-------|-------|-------|-------|
|      | 0-14                  | 15-19                 | 20-24                 | 25-29                 | 30-34 | 35-39 | 40-44 | 45-49 | 50-54 | 55-59 | 60-64 | 65-69 | 70-74 | 75-79 | 80-84 | 85-89 | 90-94 | 95+   |
| 2020 | 6.41*10 <sup>-7</sup> | 6.08*10 <sup>-7</sup> | 9.08*10 <sup>-5</sup> | 5.24*10 <sup>-2</sup> | 0.12  | 0.29  | 0.80  | 1.58  | 4.35  | 6.96  | 10.20 | 15.58 | 21.51 | 28.32 | 34.39 | 56.10 | 41.11 | 27.47 |
| 2021 | 6.97*10 <sup>-7</sup> | 6.45*10 <sup>-7</sup> | 9.25*10 <sup>-5</sup> | 5.29*10 <sup>-2</sup> | 0.12  | 0.29  | 0.79  | 1.51  | 4.10  | 7.27  | 9.60  | 15.69 | 21.33 | 28.86 | 33.74 | 57.09 | 42.09 | 29.06 |
| 2022 | 7.66*10 <sup>-7</sup> | 6.90*10 <sup>-7</sup> | 9.48*10 <sup>-5</sup> | 5.36*10 <sup>-2</sup> | 0.12  | 0.29  | 0.79  | 1.46  | 3.89  | 7.35  | 9.44  | 15.47 | 21.14 | 29.62 | 33.26 | 57.55 | 42.65 | 30.43 |
| 2023 | 8.50*10 <sup>-7</sup> | 7.47*10 <sup>-7</sup> | 9.79*10 <sup>-5</sup> | 5.45*10 <sup>-2</sup> | 0.12  | 0.29  | 0.80  | 1.43  | 3.71  | 7.18  | 9.74  | 14.78 | 21.11 | 30.33 | 33.00 | 57.43 | 43.27 | 31.81 |
| 2024 | 9.52*10 <sup>-7</sup> | 8.16*10 <sup>-7</sup> | 1.02*10 <sup>-4</sup> | 5.57*10 <sup>-2</sup> | 0.12  | 0.30  | 0.80  | 1.41  | 3.55  | 6.85  | 10.37 | 13.74 | 21.26 | 30.86 | 32.97 | 56.76 | 44.24 | 33.29 |
| 2025 | 1.08*10 <sup>-6</sup> | 9.03*10 <sup>-7</sup> | 1.07*10 <sup>-4</sup> | 5.72*10 <sup>-2</sup> | 0.13  | 0.30  | 0.81  | 1.40  | 3.38  | 6.48  | 11.07 | 12.66 | 21.57 | 30.91 | 33.27 | 55.82 | 45.41 | 34.72 |
| 2026 | 1.24*10 <sup>-6</sup> | 1.01*10 <sup>-6</sup> | 1.14*10 <sup>-4</sup> | 5.91*10 <sup>-2</sup> | 0.13  | 0.30  | 0.82  | 1.39  | 3.24  | 6.13  | 11.60 | 11.94 | 21.78 | 30.74 | 34.00 | 54.93 | 46.35 | 35.65 |
| 2027 | 1.43*10 <sup>-6</sup> | 1.15*10 <sup>-6</sup> | 1.22*10 <sup>-4</sup> | 6.15*10 <sup>-2</sup> | 0.13  | 0.30  | 0.83  | 1.39  | 3.14  | 5.83  | 11.76 | 11.79 | 21.56 | 30.57 | 35.01 | 54.33 | 46.88 | 36.25 |
| 2028 | 1.69*10 <sup>-6</sup> | 1.33*10 <sup>-6</sup> | 1.33*10 <sup>-4</sup> | 6.44*10 <sup>-2</sup> | 0.13  | 0.31  | 0.84  | 1.41  | 3.08  | 5.58  | 11.53 | 12.21 | 20.68 | 30.65 | 35.99 | 54.12 | 46.97 | 36.92 |
| 2029 | 2.02*10 <sup>-6</sup> | 1.56*10 <sup>-6</sup> | 1.46*10 <sup>-4</sup> | 6.81*10 <sup>-2</sup> | 0.14  | 0.31  | 0.85  | 1.42  | 3.06  | 5.36  | 11.05 | 13.06 | 19.30 | 31.00 | 36.78 | 54.32 | 46.63 | 37.92 |
| 2030 | 2.46*10 <sup>-6</sup> | 1.86*10 <sup>-6</sup> | 1.63*10 <sup>-4</sup> | 7.26*10 <sup>-2</sup> | 0.14  | 0.31  | 0.86  | 1.44  | 3.05  | 5.13  | 10.50 | 14.02 | 17.88 | 31.62 | 37.03 | 55.08 | 46.09 | 39.12 |
| 2031 | 3.05*10 <sup>-6</sup> | 2.26*10 <sup>-6</sup> | 1.84*10 <sup>-4</sup> | 7.82*10 <sup>-2</sup> | 0.15  | 0.32  | 0.86  | 1.47  | 3.05  | 4.94  | 9.99  | 14.77 | 16.96 | 32.11 | 37.04 | 56.61 | 45.61 | 40.15 |
| 2032 | 3.83*10 <sup>-6</sup> | 2.81*10 <sup>-6</sup> | 2.12*10 <sup>-4</sup> | 8.52*10 <sup>-2</sup> | 0.15  | 0.33  | 0.88  | 1.49  | 3.08  | 4.82  | 9.57  | 15.07 | 16.84 | 31.98 | 37.07 | 58.66 | 45.39 | 40.87 |
| 2033 | 4.91*10 <sup>-6</sup> | 3.56*10 <sup>-6</sup> | 2.47*10 <sup>-4</sup> | 9.39*10 <sup>-2</sup> | 0.16  | 0.34  | 0.89  | 1.52  | 3.13  | 4.77  | 9.22  | 14.88 | 17.57 | 30.89 | 37.42 | 60.72 | 45.53 | 41.22 |
| 2034 | 6.41*10 <sup>-6</sup> | 4.61*10 <sup>-6</sup> | 2.94*10 <sup>-4</sup> | 0.11                  | 0.17  | 0.35  | 0.91  | 1.55  | 3.19  | 4.77  | 8.92  | 14.36 | 18.93 | 29.04 | 38.13 | 62.52 | 46.03 | 41.22 |
| 2035 | 8.54*10 <sup>-6</sup> | 6.12*10 <sup>-6</sup> | 3.56*10 <sup>-4</sup> | 0.12                  | 0.18  | 0.36  | 0.93  | 1.58  | 3.26  | 4.78  | 8.61  | 13.76 | 20.48 | 27.12 | 39.20 | 63.45 | 47.06 | 41.08 |
| 2036 | 1.16*10 <sup>-5</sup> | 8.32*10 <sup>-6</sup> | 4.41*10 <sup>-4</sup> | 0.14                  | 0.20  | 0.38  | 0.96  | 1.61  | 3.34  | 4.84  | 8.37  | 13.20 | 21.77 | 25.95 | 40.17 | 64.03 | 48.80 | 41.02 |
| 2037 | 1.61*10 <sup>-5</sup> | 1.16*10 <sup>-5</sup> | 5.57*10 <sup>-4</sup> | 0.16                  | 0.22  | 0.40  | 0.99  | 1.65  | 3.43  | 4.93  | 8.24  | 12.76 | 22.42 | 26.02 | 40.38 | 64.68 | 51.04 | 41.20 |
| 2038 | 2.29*10 <sup>-5</sup> | 1.66*10 <sup>-5</sup> | 7.21*10 <sup>-4</sup> | 0.19                  | 0.25  | 0.43  | 1.03  | 1.69  | 3.54  | 5.06  | 8.24  | 12.43 | 22.36 | 27.42 | 39.40 | 65.96 | 53.38 | 41.75 |
| 2039 | 3.34*10 <sup>-5</sup> | 2.44*10 <sup>-5</sup> | 9.55*10 <sup>-4</sup> | 0.23                  | 0.28  | 0.46  | 1.07  | 1.75  | 3.64  | 5.22  | 8.32  | 12.15 | 21.83 | 29.87 | 37.46 | 67.96 | 55.56 | 42.68 |
| 2040 | 4.97*10 <sup>-5</sup> | 3.68*10 <sup>-5</sup> | 1.30*10 <sup>-3</sup> | 0.28                  | 0.32  | 0.50  | 1.13  | 1.81  | 3.75  | 5.39  | 8.45  | 11.87 | 21.16 | 32.71 | 35.39 | 70.71 | 57.06 | 44.15 |
| 2041 | 7.57*10 <sup>-5</sup> | 5.73*10 <sup>-5</sup> | 1.81*10 <sup>-3</sup> | 0.35                  | 0.37  | 0.55  | 1.20  | 1.88  | 3.87  | 5.60  | 8.65  | 11.68 | 20.57 | 35.21 | 34.31 | 73.38 | 58.33 | 46.37 |
| 2042 | 1.18*10 <sup>-4</sup> | 9.13*10 <sup>-5</sup> | 2.60*10 <sup>-3</sup> | 0.45                  | 0.44  | 0.61  | 1.28  | 1.97  | 4.02  | 5.83  | 8.94  | 11.67 | 20.15 | 36.77 | 34.88 | 74.79 | 59.74 | 49.18 |
| 2043 | 1.88*10 <sup>-4</sup> | 1.49*10 <sup>-4</sup> | 3.84*10 <sup>-3</sup> | 0.60                  | 0.52  | 0.69  | 1.39  | 2.07  | 4.19  | 6.09  | 9.32  | 11.84 | 19.92 | 37.22 | 37.30 | 74.06 | 61.82 | 52.19 |
| 2044 | 3.07*10 <sup>-4</sup> | 2.50*10 <sup>-4</sup> | 5.84*10 <sup>-3</sup> | 0.81                  | 0.64  | 0.79  | 1.52  | 2.20  | 4.39  | 6.37  | 9.76  | 12.14 | 19.78 | 36.90 | 41.28 | 71.53 | 64.71 | 55.19 |

**Table S10** Predicted age-specific rate of lung cancer DALYs attributable to occupational carcinogens

| Year | Age group |          |          |       |       |       |       |       |        |        |        |        |        |        |        |        |        |        |
|------|-----------|----------|----------|-------|-------|-------|-------|-------|--------|--------|--------|--------|--------|--------|--------|--------|--------|--------|
|      | 0-14      | 15-19    | 20-24    | 25-29 | 30-34 | 35-39 | 40-44 | 45-49 | 50-54  | 55-59  | 60-64  | 65-69  | 70-74  | 75-79  | 80-84  | 85-89  | 90-94  | 95+    |
| 2020 | 8.72E-06  | 1.38E-06 | 6.69E-04 | 3.14  | 6.72  | 14.77 | 37.34 | 68.57 | 165.51 | 225.12 | 286.63 | 366.33 | 414.27 | 432.53 | 402.23 | 501.84 | 289.97 | 148.06 |
| 2021 | 9.10E-06  | 1.42E-06 | 6.73E-04 | 3.12  | 6.72  | 14.86 | 36.84 | 65.33 | 157.15 | 233.93 | 271.04 | 366.17 | 411.94 | 439.71 | 394.59 | 508.94 | 297.22 | 156.92 |
| 2022 | 9.56E-06  | 1.48E-06 | 6.80E-04 | 3.11  | 6.74  | 14.96 | 36.68 | 62.67 | 149.52 | 236.59 | 266.74 | 359.19 | 409.12 | 449.51 | 388.57 | 511.88 | 301.95 | 164.64 |
| 2023 | 1.01E-05  | 1.55E-06 | 6.91E-04 | 3.11  | 6.77  | 15.06 | 36.82 | 60.74 | 142.82 | 232.63 | 273.89 | 342.86 | 408.40 | 458.88 | 385.19 | 510.10 | 306.59 | 172.15 |
| 2024 | 1.08E-05  | 1.64E-06 | 7.07E-04 | 3.11  | 6.78  | 15.11 | 37.10 | 59.40 | 136.52 | 224.16 | 289.02 | 319.83 | 410.09 | 465.87 | 384.82 | 504.08 | 312.67 | 179.91 |
| 2025 | 1.16E-05  | 1.75E-06 | 7.28E-04 | 3.13  | 6.78  | 15.13 | 37.39 | 58.38 | 130.18 | 214.00 | 305.78 | 296.69 | 413.50 | 467.58 | 388.18 | 495.93 | 319.56 | 187.29 |
| 2026 | 1.27E-05  | 1.88E-06 | 7.55E-04 | 3.16  | 6.77  | 15.18 | 37.73 | 57.78 | 124.39 | 203.79 | 318.70 | 281.39 | 414.56 | 466.33 | 395.79 | 487.96 | 325.04 | 192.55 |
| 2027 | 1.39E-05  | 2.05E-06 | 7.90E-04 | 3.22  | 6.77  | 15.28 | 38.12 | 57.73 | 119.75 | 194.57 | 323.45 | 277.89 | 408.08 | 464.76 | 406.04 | 482.19 | 328.07 | 196.30 |
| 2028 | 1.54E-05  | 2.26E-06 | 8.33E-04 | 3.29  | 6.78  | 15.40 | 38.51 | 58.18 | 116.53 | 186.60 | 319.32 | 286.49 | 391.10 | 465.81 | 416.17 | 479.93 | 328.25 | 200.11 |
| 2029 | 1.71E-05  | 2.52E-06 | 8.88E-04 | 3.38  | 6.83  | 15.50 | 38.82 | 58.89 | 114.48 | 179.19 | 309.12 | 303.71 | 366.50 | 469.90 | 424.46 | 481.67 | 325.86 | 205.02 |
| 2030 | 1.93E-05  | 2.85E-06 | 9.55E-04 | 3.50  | 6.90  | 15.57 | 39.08 | 59.65 | 113.10 | 171.75 | 296.63 | 322.99 | 341.75 | 476.26 | 428.22 | 488.39 | 322.26 | 210.63 |
| 2031 | 2.19E-05  | 3.28E-06 | 1.04E-03 | 3.66  | 7.01  | 15.63 | 39.44 | 60.55 | 112.58 | 165.06 | 284.11 | 338.58 | 326.00 | 480.25 | 429.55 | 500.86 | 318.91 | 215.48 |
| 2032 | 2.51E-05  | 3.82E-06 | 1.14E-03 | 3.86  | 7.17  | 15.72 | 39.96 | 61.57 | 113.20 | 159.92 | 273.00 | 345.84 | 324.01 | 475.77 | 430.84 | 517.11 | 317.16 | 218.88 |
| 2033 | 2.93E-05  | 4.52E-06 | 1.28E-03 | 4.10  | 7.38  | 15.87 | 40.54 | 62.63 | 114.89 | 156.71 | 263.65 | 343.82 | 336.38 | 459.17 | 434.85 | 533.74 | 317.89 | 220.54 |
| 2034 | 3.46E-05  | 5.45E-06 | 1.44E-03 | 4.41  | 7.65  | 16.09 | 41.11 | 63.63 | 117.19 | 155.14 | 255.14 | 335.39 | 359.34 | 433.60 | 442.04 | 548.56 | 321.49 | 220.62 |
| 2035 | 4.15E-05  | 6.69E-06 | 1.66E-03 | 4.79  | 7.99  | 16.40 | 41.62 | 64.59 | 119.70 | 154.57 | 246.60 | 324.55 | 385.38 | 407.73 | 451.80 | 558.08 | 328.73 | 220.02 |
| 2036 | 5.02E-05  | 8.37E-06 | 1.93E-03 | 5.26  | 8.42  | 16.81 | 42.17 | 65.79 | 122.61 | 155.27 | 239.17 | 313.71 | 407.69 | 392.49 | 459.76 | 564.95 | 340.21 | 219.73 |
| 2037 | 6.16E-05  | 1.07E-05 | 2.30E-03 | 5.85  | 8.96  | 17.36 | 42.83 | 67.30 | 125.92 | 157.68 | 234.03 | 304.44 | 420.57 | 393.99 | 460.01 | 572.29 | 354.75 | 220.70 |
| 2038 | 7.65E-05  | 1.40E-05 | 2.78E-03 | 6.61  | 9.63  | 18.05 | 43.68 | 69.02 | 129.49 | 161.75 | 231.81 | 297.18 | 422.63 | 413.45 | 448.76 | 583.86 | 370.12 | 223.60 |
| 2039 | 9.63E-05  | 1.86E-05 | 3.42E-03 | 7.56  | 10.46 | 18.92 | 44.79 | 70.79 | 133.10 | 166.92 | 232.17 | 290.95 | 417.10 | 446.84 | 428.72 | 600.45 | 384.84 | 228.78 |
| 2040 | 1.23E-04  | 2.54E-05 | 4.31E-03 | 8.80  | 11.50 | 20.01 | 46.22 | 72.57 | 136.83 | 172.67 | 234.26 | 284.80 | 408.75 | 485.31 | 408.27 | 621.52 | 396.50 | 236.90 |
| 2041 | 1.61E-04  | 3.55E-05 | 5.55E-03 | 10.41 | 12.81 | 21.38 | 48.03 | 74.52 | 141.29 | 179.31 | 238.58 | 280.03 | 400.55 | 520.50 | 398.44 | 641.21 | 406.92 | 248.56 |
| 2042 | 2.15E-04  | 5.09E-05 | 7.33E-03 | 12.54 | 14.46 | 23.07 | 50.30 | 76.80 | 146.69 | 186.91 | 245.90 | 278.12 | 394.54 | 545.01 | 405.96 | 651.17 | 418.39 | 263.07 |
| 2043 | 2.91E-04  | 7.47E-05 | 9.91E-03 | 15.40 | 16.56 | 25.18 | 53.14 | 79.58 | 152.85 | 195.34 | 256.35 | 279.96 | 391.39 | 556.58 | 432.93 | 645.56 | 433.79 | 278.93 |
| 2044 | 4.01E-04  | 1.12E-04 | 1.37E-02 | 19.30 | 19.28 | 27.82 | 56.68 | 83.01 | 159.51 | 204.37 | 269.21 | 285.36 | 389.95 | 559.01 | 476.16 | 627.64 | 454.00 | 295.14 |

**Table S11** Contribution of changes in population aging, population growth, and age-specific death rate to the net change of lung cancer from occupational carcinogens in China from 1991 to 2044\*.

| Year | Population aging, n(%) | Age-specific rate ,n(%) | Population growth, n(%) | Net change, n (%) |
|------|------------------------|-------------------------|-------------------------|-------------------|
| 1991 | 300(1.5)               | 185(0.9)                | 261(1.3)                | 746(3.6)          |
| 1992 | 330(1.6)               | 463(2.3)                | 515(2.5)                | 1308(6.4)         |
| 1993 | 952(4.6)               | 341(1.7)                | 754(3.7)                | 2047(10)          |
| 1994 | 1331(6.5)              | 340(1.7)                | 986(4.8)                | 2657(12.9)        |
| 1995 | 1745(8.5)              | 527(2.6)                | 1214(5.9)               | 3486(16.9)        |
| 1996 | 2230(10.8)             | 865(4.2)                | 1443(7)                 | 4538(22.1)        |
| 1997 | 2740(13.3)             | 1049(5.1)               | 1664(8.1)               | 5453(26.5)        |
| 1998 | 3277(15.9)             | 1296(6.3)               | 1885(9.2)               | 6458(31.4)        |
| 1999 | 3927(19.1)             | 1840(8.9)               | 2117(10.3)              | 7884(38.3)        |
| 2000 | 4624(22.5)             | 2930(14.2)              | 2370(11.5)              | 9924(48.2)        |
| 2001 | 5408(26.3)             | 3701(18.0)              | 2611(12.7)              | 11720(57)         |
| 2002 | 6242(30.3)             | 4625(22.5)              | 2857(13.9)              | 13724(66.7)       |
| 2003 | 7137(34.7)             | 5446(26.5)              | 3097(15.1)              | 15680(76.2)       |
| 2004 | 8126(39.5)             | 6220(30.2)              | 3334(16.2)              | 17680(85.9)       |
| 2005 | 9105(44.3)             | 6560(31.9)              | 3543(17.2)              | 19208(93.4)       |
| 2006 | 10162(49.4)            | 6658(32.4)              | 3744(18.2)              | 20564(100)        |
| 2007 | 11324(55.0)            | 7163(34.8)              | 3979(19.3)              | 22466(109.2)      |
| 2008 | 12667(61.6)            | 8340(40.5)              | 4266(20.7)              | 25273(122.9)      |
| 2009 | 14087(68.5)            | 9186(44.7)              | 4541(22.1)              | 27814(135.2)      |
| 2010 | 15611(75.9)            | 10487(51.0)             | 4849(23.6)              | 30947(150.4)      |
| 2011 | 16960(82.4)            | 10726(52.1)             | 5087(24.7)              | 32773(159.3)      |
| 2012 | 18140(88.2)            | 10415(50.6)             | 5301(25.8)              | 33856(164.6)      |
| 2013 | 19088(92.8)            | 9295(45.2)              | 5464(26.6)              | 33847(164.5)      |
| 2014 | 20191(98.1)            | 8571(41.7)              | 5656(27.5)              | 34418(167.3)      |
| 2015 | 21343(103.7)           | 7998(38.9)              | 5885(28.6)              | 35226(171.2)      |
| 2016 | 22538(109.6)           | 7642(37.1)              | 6177(30)                | 36357(176.7)      |
| 2017 | 23758(115.5)           | 7440(36.2)              | 6478(31.5)              | 37676(183.1)      |
| 2018 | 25143(122.2)           | 7712(37.5)              | 6788(33)                | 39643(192.7)      |
| 2019 | 26780(130.2)           | 8388(40.8)              | 7120(34.6)              | 42288(205.6)      |
| 2020 | 25675(124.8)           | 9151(44.5)              | 7562(36.8)              | 42388(206)        |
| 2021 | 27214(132.3)           | 9265(45.0)              | 7842(38.1)              | 44321(215.4)      |
| 2022 | 28744(139.7)           | 9365(45.5)              | 8109(39.4)              | 46218(224.7)      |
| 2023 | 30253(147.1)           | 9400(45.7)              | 8355(40.6)              | 48008(233.4)      |
| 2024 | 31779(154.5)           | 9426(45.8)              | 8589(41.8)              | 49794(242)        |
| 2025 | 33331(162.0)           | 9460(46.0)              | 8813(42.8)              | 51604(250.8)      |
| 2026 | 35014(170.2)           | 9715(47.2)              | 9049(44)                | 53778(261.4)      |
| 2027 | 36646(178.1)           | 9946(48.3)              | 9268(45)                | 55860(271.5)      |
| 2028 | 38207(185.7)           | 10109(49.1)             | 9462(46)                | 57778(280.9)      |
| 2029 | 39745(193.2)           | 10266(49.9)             | 9640(46.9)              | 59651(290)        |
| 2030 | 41303(200.8)           | 10505(51.1)             | 9811(47.7)              | 61619(299.5)      |
| 2031 | 42960(208.8)           | 11034(53.6)             | 9997(48.6)              | 63991(311.1)      |

|      |               |               |              |               |
|------|---------------|---------------|--------------|---------------|
| 2032 | 44547(216.5)  | 11591(56.3)   | 10167(49.4)  | 66305(322.3)  |
| 2033 | 46074(224)    | 12145(59.0)   | 10319(50.2)  | 68538(333.2)  |
| 2034 | 47636(231.6)  | 12734(61.9)   | 10462(50.9)  | 70832(344.3)  |
| 2035 | 49313(239.7)  | 13455(65.4)   | 10610(51.6)  | 73378(356.7)  |
| 2036 | 51234(249)    | 14567(70.8)   | 10788(52.4)  | 76589(372.3)  |
| 2037 | 53219(258.7)  | 15843(77.0)   | 10970(53.3)  | 80032(389)    |
| 2038 | 55210(268.4)  | 17245(83.8)   | 11147(54.2)  | 83602(406.4)  |
| 2039 | 57202(278.1)  | 18765(91.2)   | 11316(55)    | 87283(424.3)  |
| 2040 | 59236(287.9)  | 20473(99.5)   | 11485(55.8)  | 91194(443.3)  |
| 2041 | 61564(299.3)  | 22716(110.4)  | 11693(56.8)  | 95973(466.5)  |
| 2042 | 63862(310.4)  | 25150(122.3)  | 11895(57.8)  | 100907(490.5) |
| 2043 | 66084(321.2)  | 27752(134.9)  | 12086(58.7)  | 105922(514.9) |
| 2044 | 68306 (332.0) | 30612 (148.8) | 12277 (59.7) | 111195(540.5) |

\*Using 1990 as the reference year.

**Table S12** Contribution of changes in population aging, population growth, and age-specific rate to the net change of lung cancer DALYs from occupational carcinogens in China from 1991 to 2044\*.

| Year | Population aging, n(%) | Age-specific rate ,n(%) | Population growth, n(%) | Net change, n (%) |
|------|------------------------|-------------------------|-------------------------|-------------------|
| 1991 | 8084(1.4)              | 4075(0.7)               | 7435(1.3)               | 19593(3.3)        |
| 1992 | 14448(2.5)             | 2637(0.4)               | 14520(2.5)              | 31605(5.4)        |
| 1993 | 25591(4.4)             | 5810(1.0)               | 21415(3.6)              | 52816(9.0)        |
| 1994 | 36012(6.1)             | 5660(1.0)               | 27977(4.8)              | 69649(11.9)       |
| 1995 | 47351(8.1)             | 11141(1.9)              | 34448(5.9)              | 92939(15.8)       |
| 1996 | 60586(10.3)            | 18614(3.2)              | 40860(7.0)              | 120060(20.5)      |
| 1997 | 74291(12.7)            | 21907(3.7)              | 47034(8.0)              | 143231(24.4)      |
| 1998 | 88514(15.1)            | 27634(4.7)              | 53187(9.1)              | 169334(28.9)      |
| 1999 | 105790(18.0)           | 39877(6.8)              | 59578(10.2)             | 205245(35.0)      |
| 2000 | 123972(21.1)           | 65764(11.2)             | 66445(11.3)             | 256181(43.7)      |
| 2001 | 144321(24.6)           | 80218(13.7)             | 72794(12.4)             | 297332(50.7)      |
| 2002 | 165877(28.3)           | 99109(16.9)             | 79277(13.5)             | 344263(58.7)      |
| 2003 | 188754(32.2)           | 111483(19.0)            | 85333(14.5)             | 385569(65.7)      |
| 2004 | 214444(36.5)           | 125397(21.4)            | 91455(15.6)             | 431296(73.5)      |
| 2005 | 239767(40.9)           | 126903(21.6)            | 96713(16.5)             | 463383(79.0)      |
| 2006 | 266288(45.4)           | 122765(20.9)            | 101751(17.3)            | 490804(83.7)      |
| 2007 | 294211(50.1)           | 128636(21.9)            | 107543(18.3)            | 530391(90.4)      |
| 2008 | 323768(55.2)           | 144319(24.6)            | 114069(19.4)            | 582156(99.2)      |
| 2009 | 353845(60.3)           | 149455(25.5)            | 119996(20.5)            | 623297(106.2)     |
| 2010 | 387631(66.1)           | 169345(28.9)            | 126957(21.6)            | 683933(116.6)     |
| 2011 | 418758(71.4)           | 169655(28.9)            | 132618(22.6)            | 721031(122.9)     |
| 2012 | 446679(76.1)           | 159930(27.3)            | 137994(23.5)            | 744602(126.9)     |
| 2013 | 469434(80.0)           | 132074(22.5)            | 142233(24.2)            | 743741(126.8)     |
| 2014 | 494136(84.2)           | 111982(19.1)            | 146949(25.0)            | 753067(128.4)     |
| 2015 | 521338(88.9)           | 97416(16.6)             | 152751(26.0)            | 771505(131.5)     |
| 2016 | 547965(93.4)           | 87995(15.0)             | 160024(27.3)            | 795984(135.7)     |

|      |                |              |              |                |
|------|----------------|--------------|--------------|----------------|
| 2017 | 574176(97.9)   | 81886(14.0)  | 167420(28.5) | 823482(140.4)  |
| 2018 | 604295(103.0)  | 88418(15.1)  | 175013(29.8) | 867725(147.9)  |
| 2019 | 637889(108.7)  | 102534(17.5) | 182720(31.1) | 923143(157.3)  |
| 2020 | 610616(104.1)  | 86531(14.7)  | 191428(32.6) | 888576(151.4)  |
| 2021 | 637419(108.6)  | 79400(13.5)  | 196810(33.5) | 913628(155.7)  |
| 2022 | 664315(113.2)  | 72296(12.3)  | 201834(34.4) | 938446(159.9)  |
| 2023 | 690633(117.7)  | 64147(10.9)  | 206370(35.2) | 961150(163.8)  |
| 2024 | 718218(122.4)  | 57410(9.8)   | 210729(35.9) | 986357(168.1)  |
| 2025 | 745522(127.1)  | 50538(8.6)   | 214712(36.6) | 1010772(172.3) |
| 2026 | 770748(131.4)  | 45674(7.8)   | 218276(37.2) | 1034698(176.4) |
| 2027 | 794991(135.5)  | 40947(7.0)   | 221434(37.7) | 1057371(180.2) |
| 2028 | 817952(139.4)  | 35865(6.1)   | 224122(38.2) | 1077939(183.7) |
| 2029 | 839988(143.2)  | 31085(5.3)   | 226410(38.6) | 1097484(187.1) |
| 2030 | 861383(146.8)  | 27258(4.6)   | 228371(38.9) | 1117011(190.4) |
| 2031 | 879416(149.9)  | 26669(4.5)   | 229895(39.2) | 1135979(193.6) |
| 2032 | 896462(152.8)  | 28149(4.8)   | 231205(39.4) | 1155817(197.0) |
| 2033 | 912876(155.6)  | 31100(5.3)   | 232296(39.6) | 1176272(200.5) |
| 2034 | 929951(158.5)  | 35432(6.0)   | 233261(39.8) | 1198645(204.3) |
| 2035 | 948510(161.7)  | 41158(7.0)   | 234163(39.9) | 1223831(208.6) |
| 2036 | 966464(164.7)  | 51252(8.7)   | 234974(40.0) | 1252690(213.5) |
| 2037 | 986428(168.1)  | 65283(11.1)  | 235993(40.2) | 1287703(219.5) |
| 2038 | 1007685(171.7) | 82930(14.1)  | 237129(40.4) | 1327743(226.3) |
| 2039 | 1029725(175.5) | 103687(17.7) | 238278(40.6) | 1371690(233.8) |
| 2040 | 1052187(179.3) | 127122(21.7) | 239351(40.8) | 1418660(241.8) |
| 2041 | 1073781(183.0) | 156696(26.7) | 240421(41.0) | 1470898(250.7) |
| 2042 | 1096552(186.9) | 192102(32.7) | 241728(41.2) | 1530382(260.8) |
| 2043 | 1120349(191.0) | 233630(39.8) | 243266(41.5) | 1597244(272.2) |
| 2044 | 1145451(195.2) | 281623(48.0) | 245037(41.8) | 1672111(285.0) |

---

\*Using 1990 as the reference year.
